# Supplementary material for: A colorimetric sensing platform for the determination of H2O2 using 2D–1D MoS2-CNT nanozymes
Source: Royal Society of Chemistry journal article supplement (doi:10.1039/d2ra04831k), 2022-01-01
Supplement: d2ra04831k1.pdf [file d2ra04831k1.pdf]

## Supporting Information

### **A colorimetric sensing platform for determination of H<sub>2</sub>O<sub>2</sub> with 2D- 1D MoS<sub>2</sub>-CNTs nanozymes**

Xin Zhang<sup>a</sup>, Siqin Wang<sup>a</sup>, Jiahao Dao<sup>a</sup>, Jiajing Guo and Yanfang Gao <sup>a\*</sup>

College of Chemical Engineering, Inner Mongolia University of Technology;

49 Aimin Road, Hohhot, 100085, China.

Tel: +86 471 6575722

Fax: +86 471 6503298

E-mail: yf\_gao@imut.edu.cn

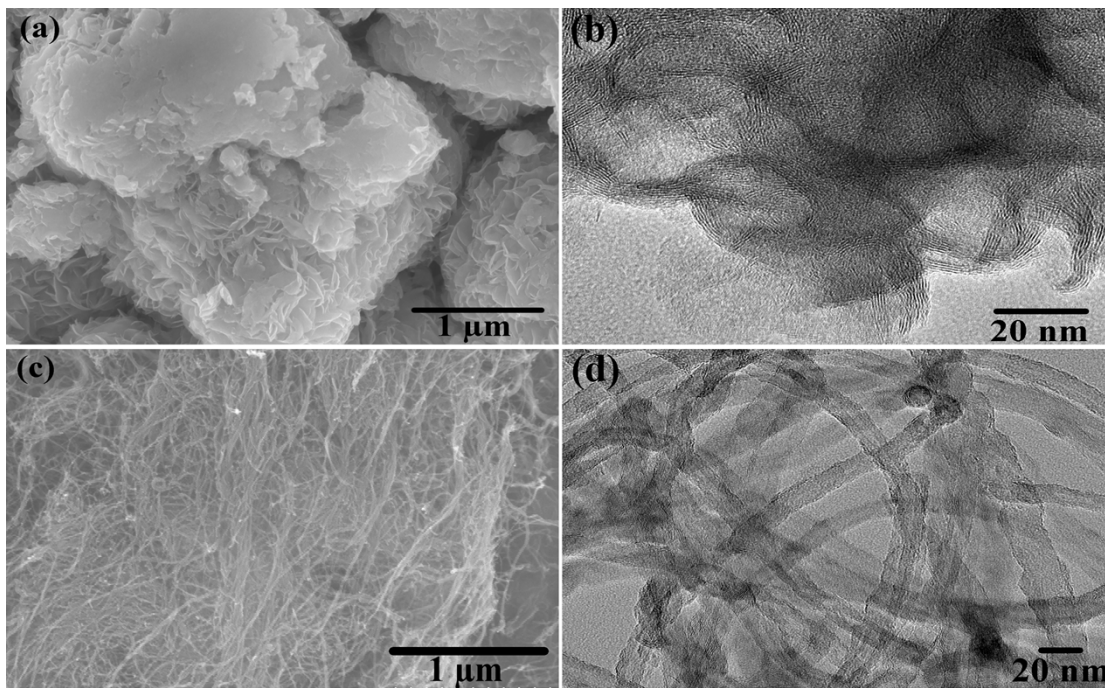

Fig. S1 (a) SEM and (b) TEM images of MoS<sub>2</sub> NSs, (c) SEM and (d) TEM images of CNTs.

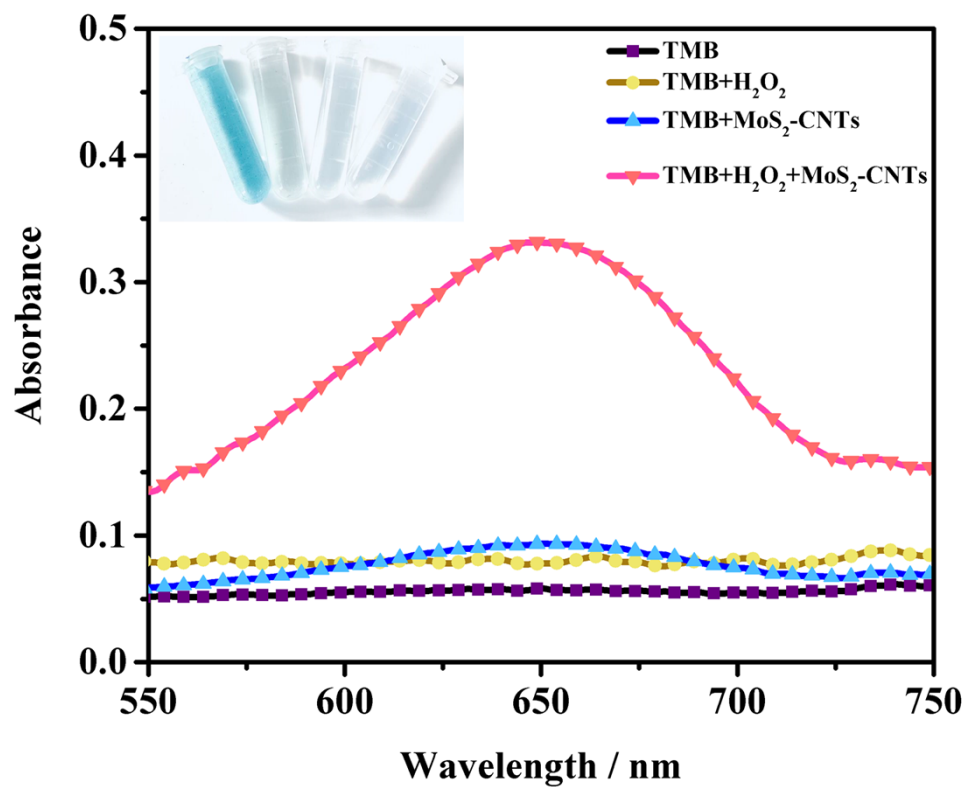

Fig. S2 The absorption spectrum with such reaction systems. inset: from left to right: TMB+H<sub>2</sub>O<sub>2</sub>+MoS<sub>2</sub>-CNTs, TMB+ MoS<sub>2</sub>-CNTs, TMB+H<sub>2</sub>O<sub>2</sub>, TMB.

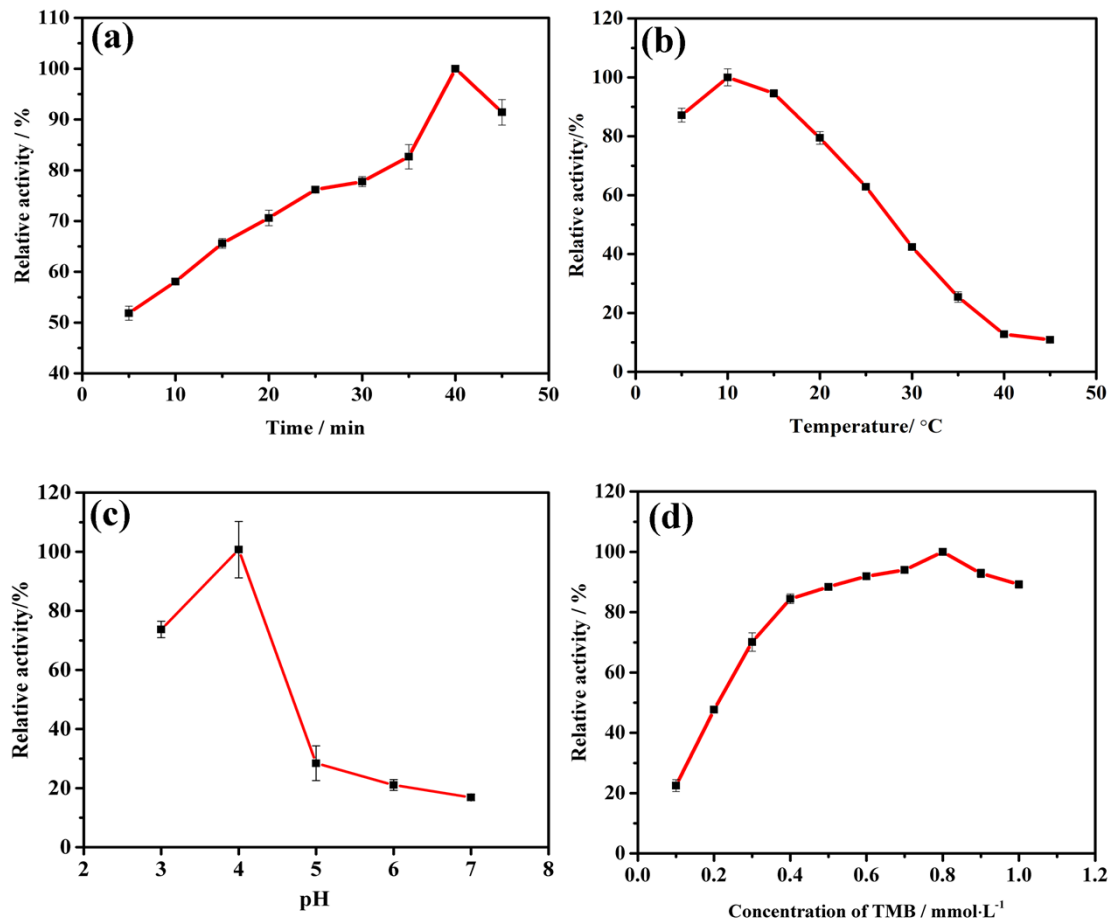

Fig.S3 Dependence of the POD-like of MoS<sub>2</sub>-CNTs nanozyme on (a) time, (b) temperature, (c) pH and (d) concentration of TMB.
